# Supplementary material for: Layered rare-earth hydroxide (LRH, R = Tb, Y) composites with fluorescein: delamination, tunable luminescence and application in chemosensoring for detecting Fe(iii) ions
Source: Royal Society of Chemistry journal article supplement (doi:10.1039/c8dt00409a), 2018-01-01
Supplement: c8dt00409a1.pdf [file c8dt00409a1.pdf]

## Electronic Supplementary Information (ESI)

### Layered rare-earth hydroxide (LRH, R = Tb, Y) composites with fluorescein: delamination, tunable luminescence and application on chemosensing for detecting Fe(III) ions

Feifei Su,<sup>a</sup> Rong Guo,<sup>a</sup> Zihuan Yu,<sup>a</sup> Jian Li,<sup>b</sup> Zupei Liang,<sup>b</sup> Keren Shi,<sup>c</sup> Shulan Ma,<sup>a,\*</sup> Genban Sun,<sup>a</sup> and  
Huifeng Li<sup>a</sup>

<sup>a</sup> Beijing Key Laboratory of Energy Conversion and Storage Materials and College of Chemistry,  
Beijing Normal University, Beijing 100875, P. R. China. *E-mail:* [mashulan@bnu.edu.cn](mailto:mashulan@bnu.edu.cn), *Tel:* +86-  
10-58807524. *Fax:* +86-10-58802075.

<sup>b</sup> Department of Chemistry and Chemical Engineering, Weifang University, Weifang 261061, China.

<sup>c</sup> State Key Laboratory of High-efficiency Utilization of Coal and Green Chemical Engineering,  
Ningxia University, Yinchuan 750021, China.

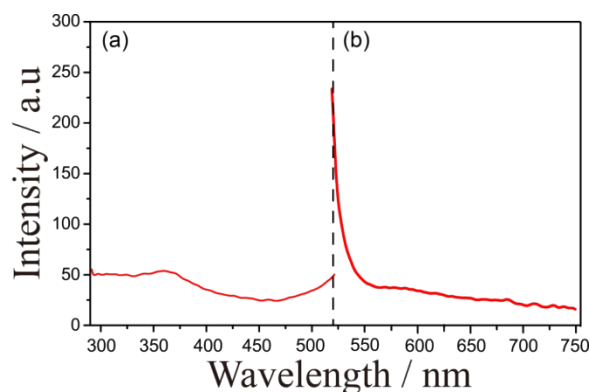

**Fig. S1** Excitation (a) and emission (b) spectra of FLN-Na in solid state.

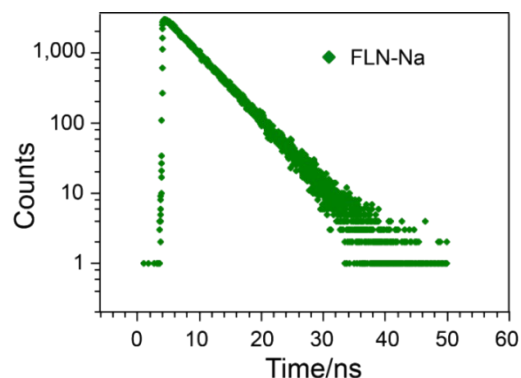

**Fig. S2** Photoluminescence decay curve of FLN-Na.

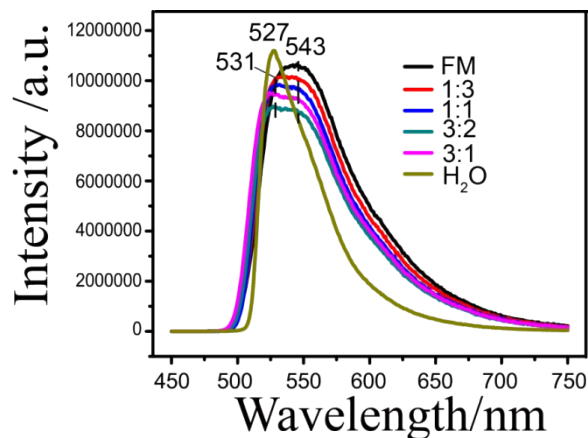

**Fig. S3** Emission spectra of FLN-Na (FLN:NaOH = 1:1) when dissolved in pure FM (543 nm), water (527 nm) and in FM/water mixtures (0.003 g FLN-Na dissolved in 30 ml solvents).

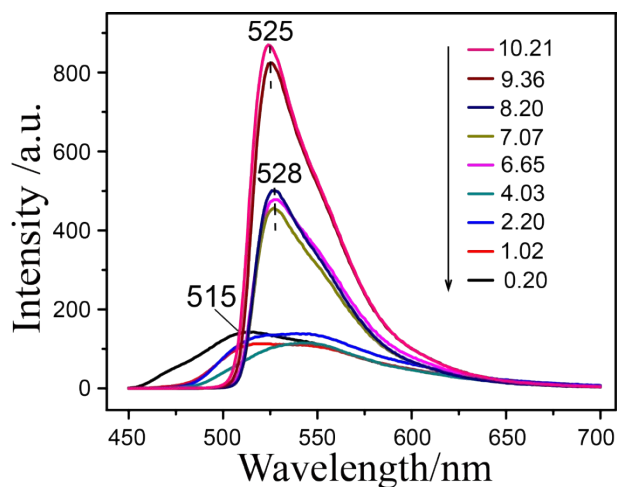

**Fig. S4** Emission spectra of the aqueous solutions of FLN-Na ( $5.4 \times 10^{-4}$  M) at different pH. The photoluminescence of FLN-Na in solutions with different pH was presented in Fig. S6. With the pH increase from 0.20 to 10.21, the luminescence intensity was gradually enhanced and the photoluminescence spectra became sharp. this indicates that the pH has big influence for the emission intensity and the emission wavelength.

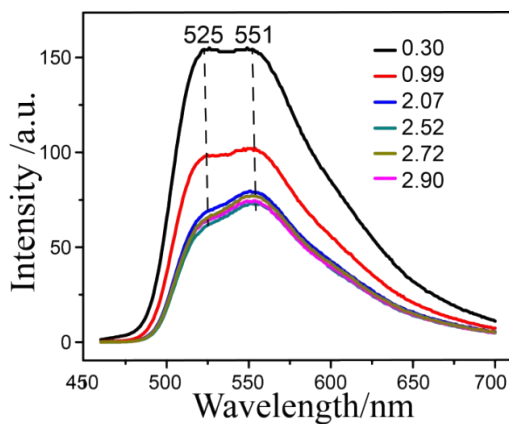

**Fig. S5** Emission spectra of the mixed solution of 3 ml FM solution of FLN-Na ( $5.4 \times 10^{-4}$  M) and 1 mL  $\text{Fe}^{3+}$  aqueous solutions ( $9.1 \times 10^{-3}$  M, 500 ppm) at different pH. The emission intensity of FLN-Na tended to decrease following the increase of pH value of  $\text{Fe}^{3+}$  solution. However, the intensity hardly changed at the pH range of 2-3. Above results indicate the emission will be decreased at the pH of 0~2. The pH values of the solutions including  $\text{Fe}^{3+}$  in the present our system were larger than 2, and only the luminescence intensity in this range is comparable with other ions.

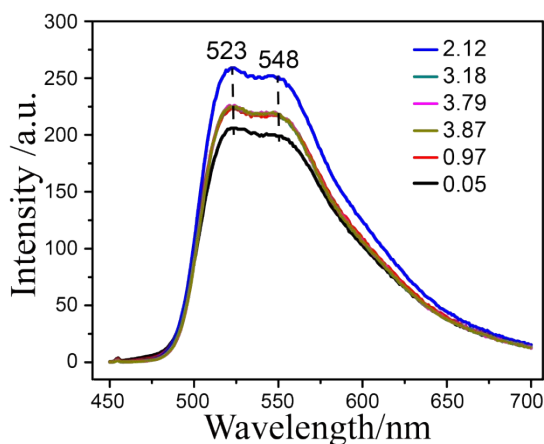

**Fig. S6** Emission spectra of the mixed solution of 3 ml FM solution of FLN-Na ( $5.4 \times 10^{-4}$  M) and 1 mL  $\text{Al}^{3+}$  aqueous solutions ( $1.8 \times 10^{-2}$  M, 500 ppm) at different pH. The emissions of FLN-Na mixed with  $\text{Al}^{3+}$  at different pH were shown in Fig. S5. the fluorescence intensity was gradually enhanced after added  $\text{Al}^{3+}$  with the pH increase from 0.05 to 0.97 and then to 2.12, however, when the pH were 3.18, 3.79 and 3.87, the emission intensity dropped down to that the pH of 0.97. So there is an optimal pH value for the luminescence intensity of mixed solution of FLN-Na and  $\text{Al}^{3+}$ .

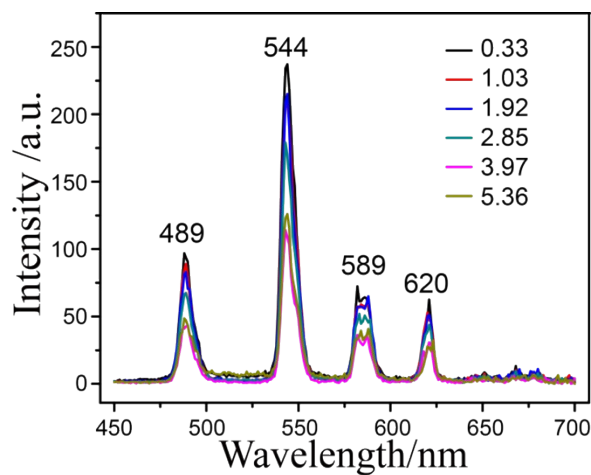

**Fig. S7** Emission spectra of the  $\text{Tb}(\text{NO}_3)_3 \cdot 6\text{H}_2\text{O}$  aqueous solutions ( $5 \times 10^{-3} \text{ M}$ ) at different pH. The luminescence intensity gradually decreased with the increase of pH from 0.33 to 5.36, suggesting lower pH contributed to relatively better luminescence property for  $\text{Tb}^{3+}$ .

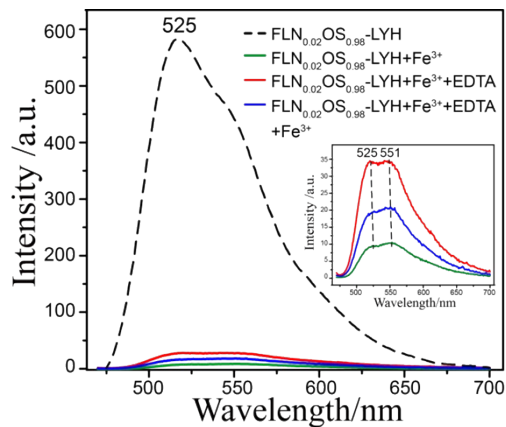

**Fig. S8** Fluorescence spectra of  $\text{FLN}_{0.02}\text{OS}_{0.98}\text{-LYH}$  colloid in FM after subsequent addition of  $\text{Fe}^{3+}$  and EDTA.
